# Supplementary material
Source: PubMed Central journal article supplement (PMC2987379)
Supplement: ejhg201032x4.pdf [file ejhg201032x4.pdf]

# Histogram of the Number of Minor Allele Carriers at 4 Associated SNPs by HLA-B\*44 Status

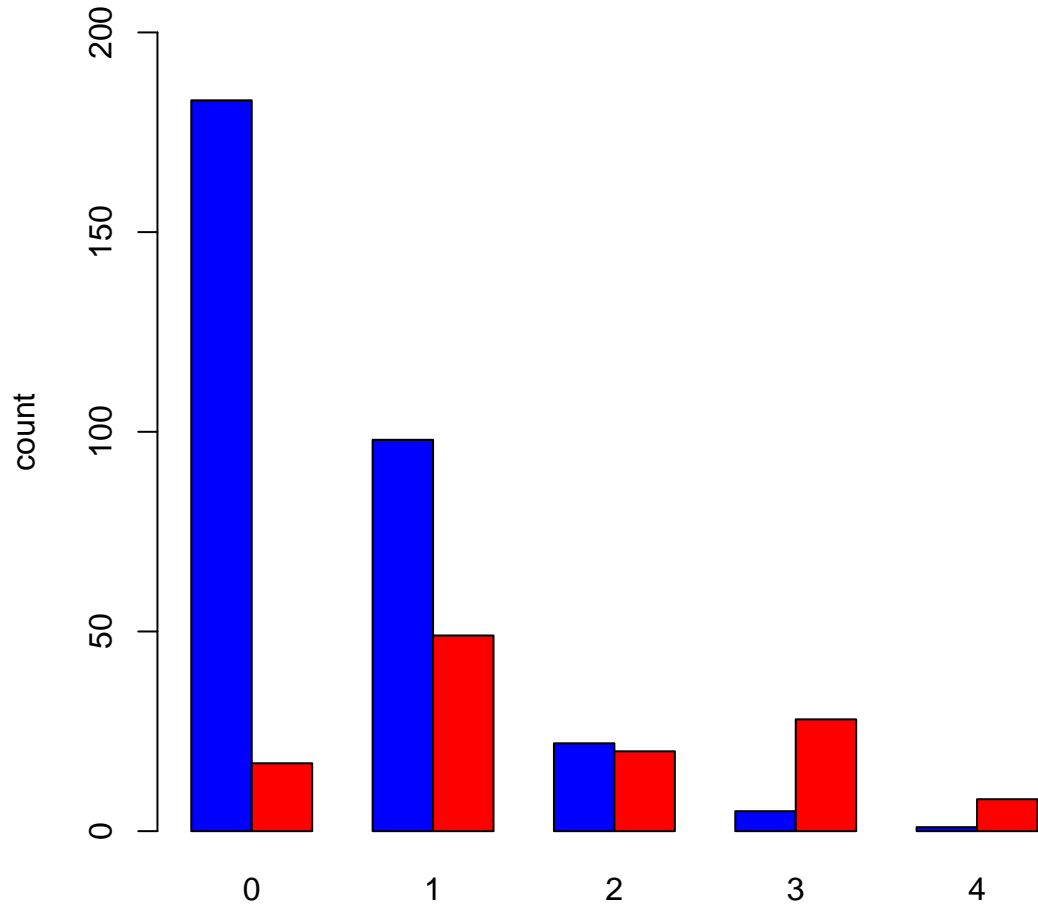

Blue = HLA-B\*44- Red = HLA-B\*44+
