# Supplementary material
Source: PubMed Central journal article supplement (PMC2987379)

# Histogram of the Number of Minor Allele Carriers at 9 Associated SNPs by HLA-C\*0702 Status

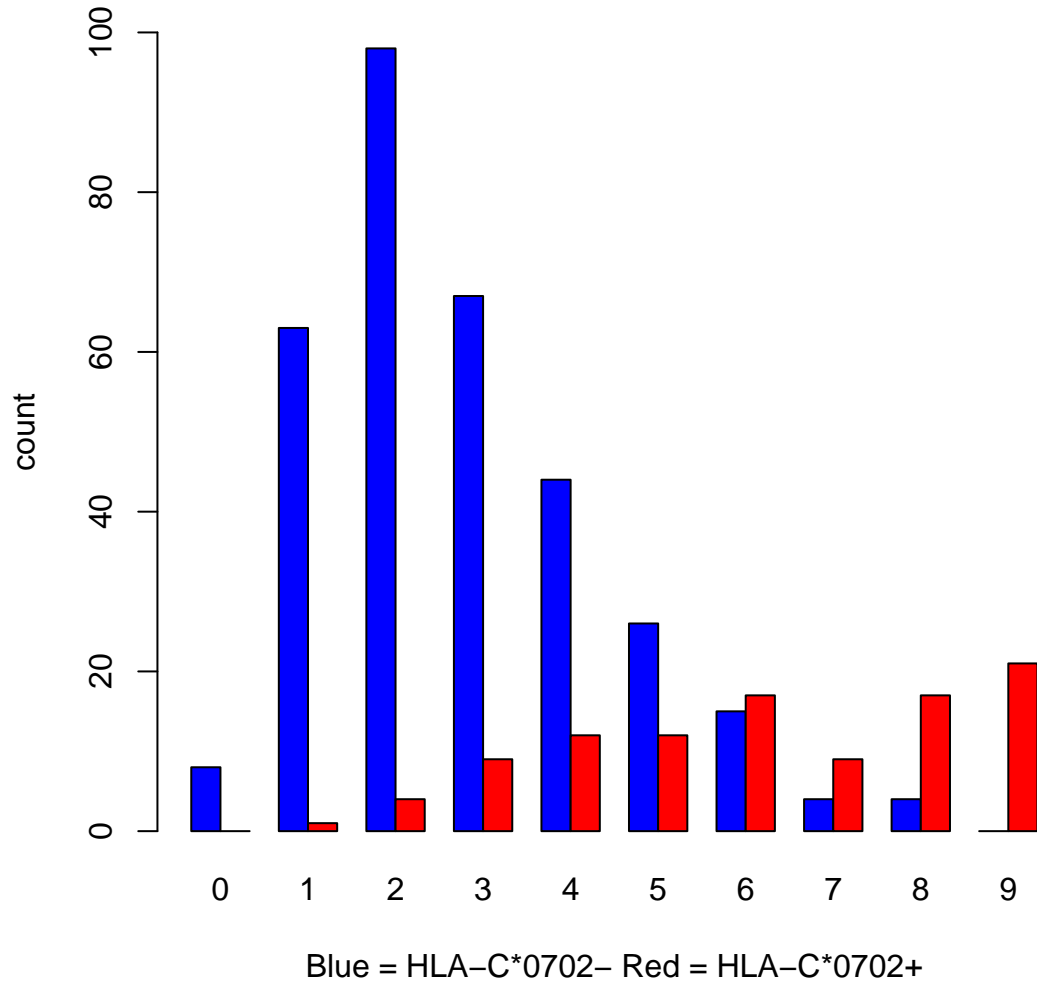

Supplement: ejhg201032x10.pdf [file ejhg201032x10.pdf]

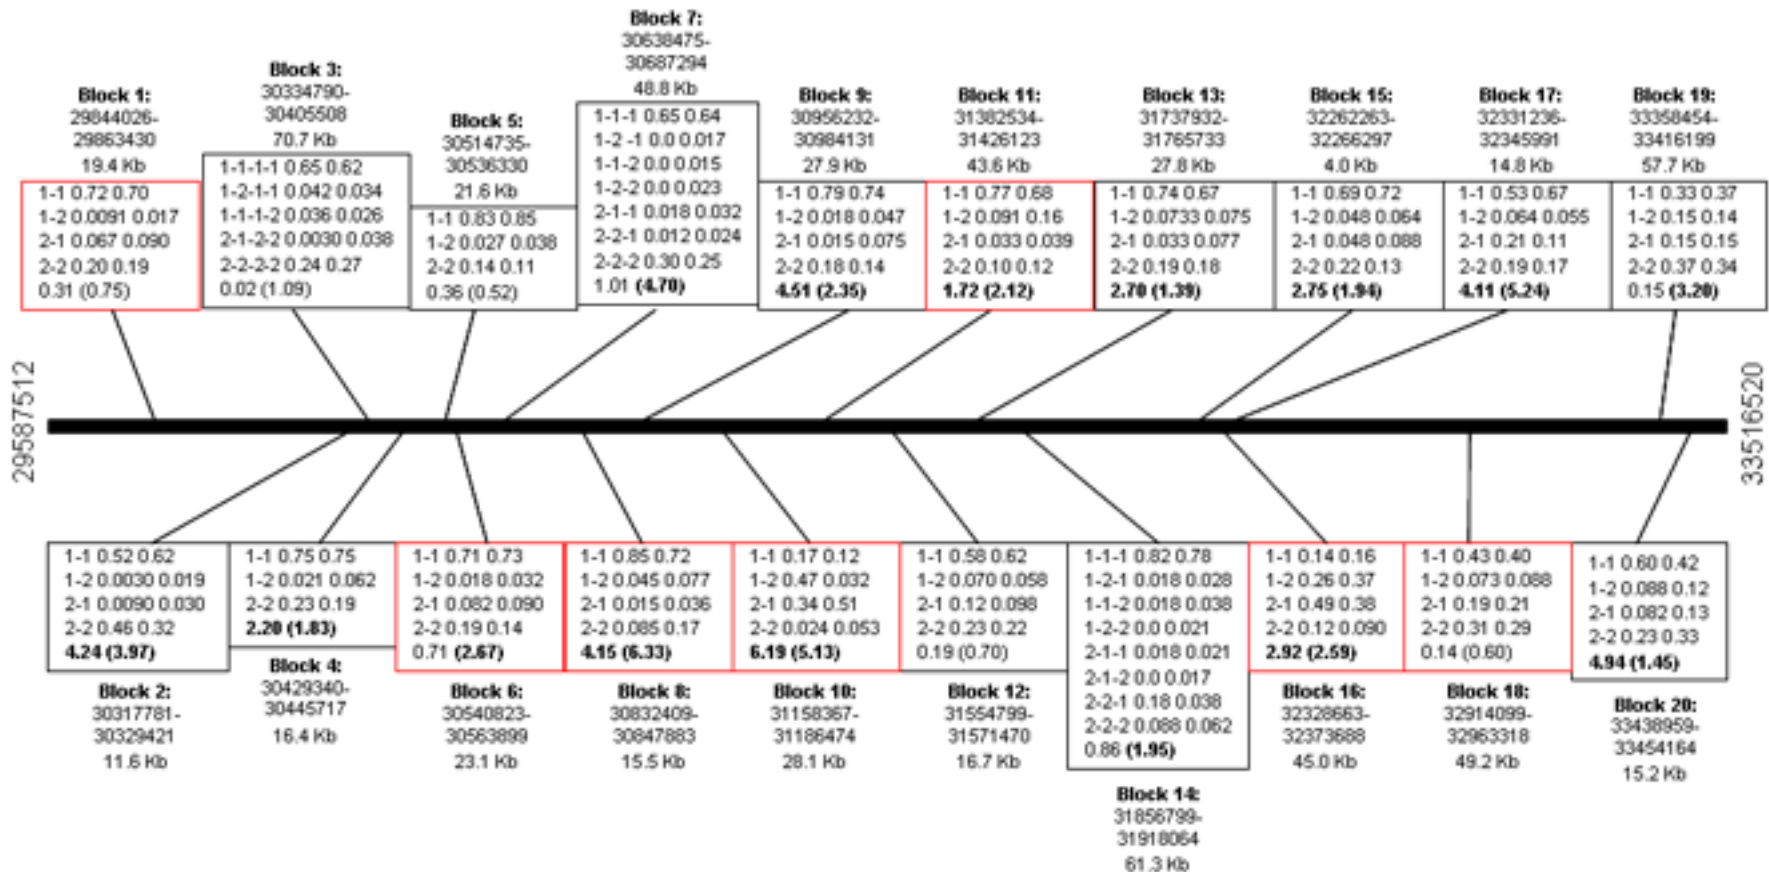

Supplement: ejhg201032x11.pdf [file ejhg201032x11.pdf]

# Histogram of the Number of Minor Allele Carriers at 33 Associated SNPs by HLA-A\*29 Status

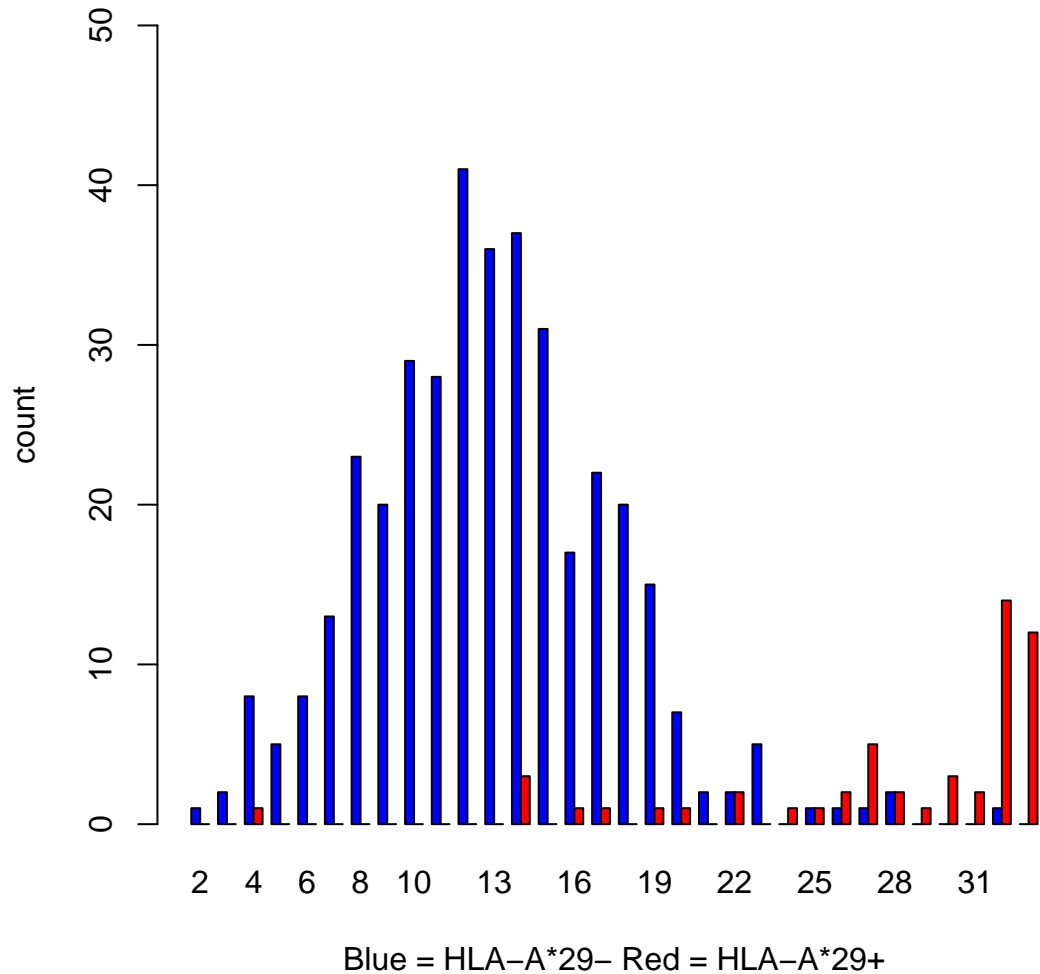

Supplement: ejhg201032x2.pdf [file ejhg201032x2.pdf]

# Histogram of the Number of Minor Allele Carriers at 11 Associated SNPs by HLA-B\*07 Status

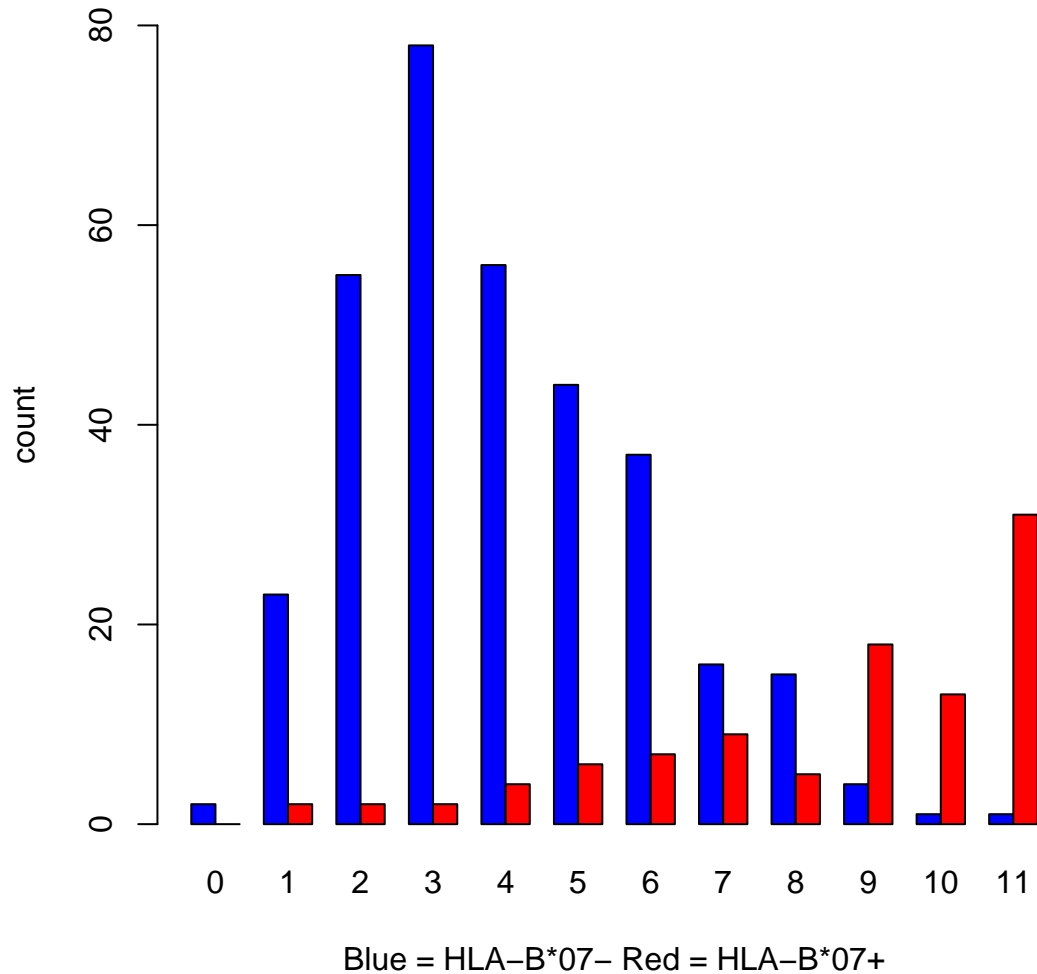

Supplement: ejhg201032x3.pdf [file ejhg201032x3.pdf]

# Histogram of the Number of Minor Allele Carriers at 8 Associated SNPs by HLA-C\*05 Status

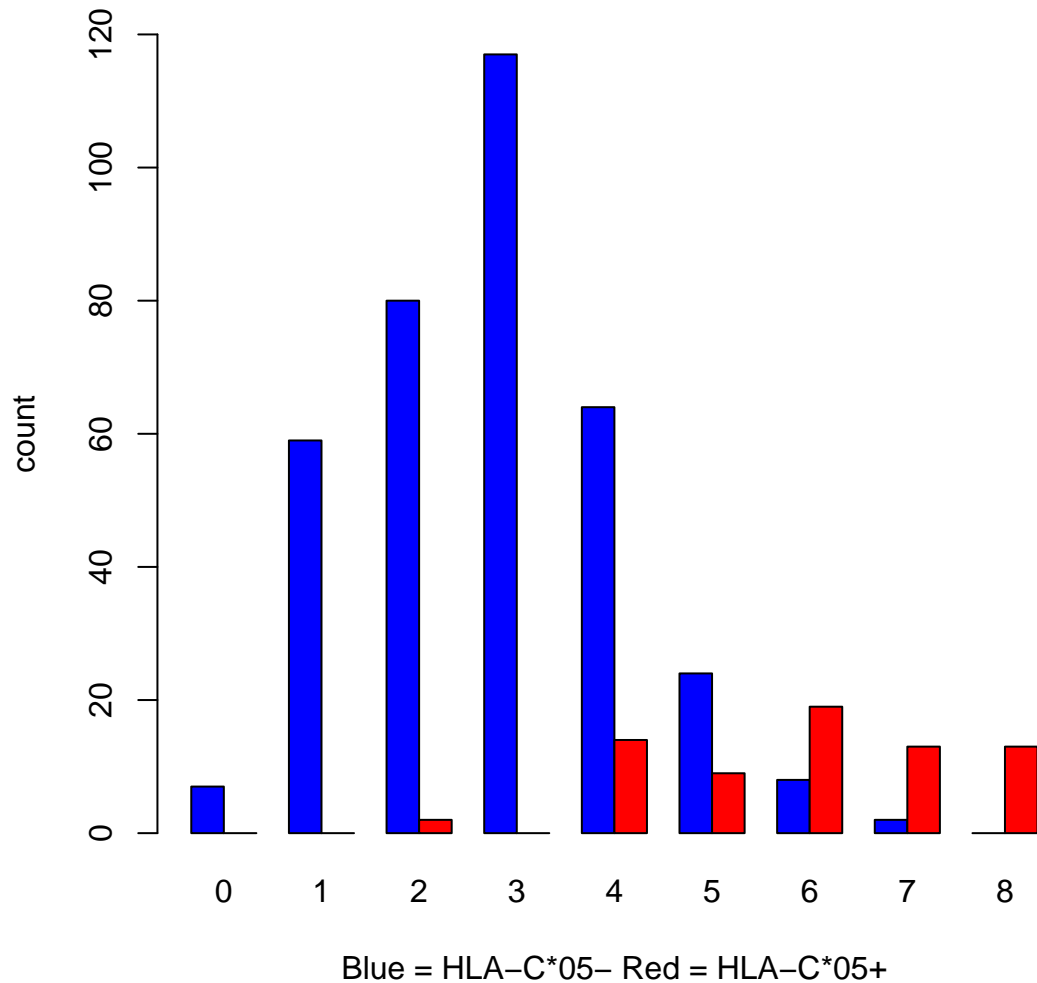

Supplement: ejhg201032x6.pdf [file ejhg201032x6.pdf]

# Histogram of the Number of Minor Allele Carriers at 11 Associated SNPs by HLA-C\*0701 Status

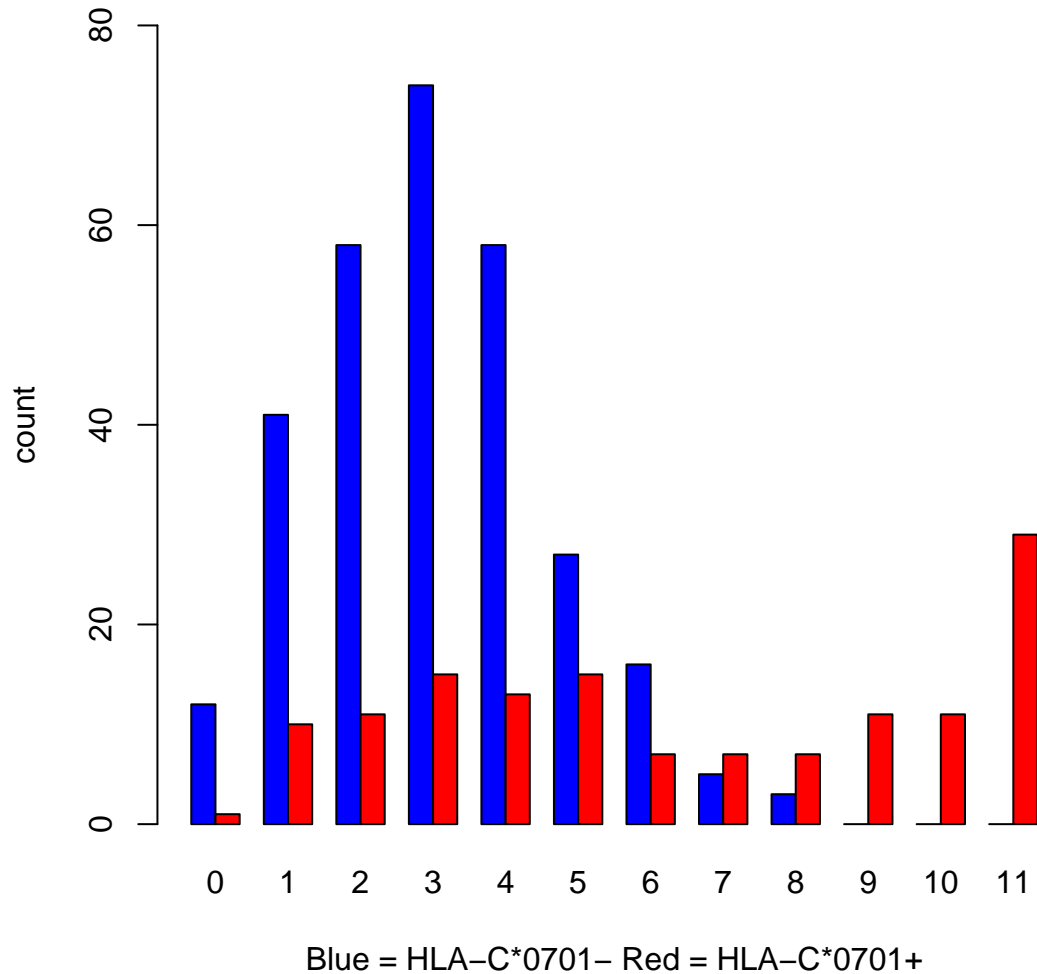

Supplement: ejhg201032x9.pdf [file ejhg201032x9.pdf]
